# Supplementary material for: An electrochemical approach to graphene oxide coated sulfur for long cycle life
Source: Royal Society of Chemistry journal article supplement (doi:10.1039/c5nr01951f), 2015-01-01
Supplement: c5nr01951f1.pdf [file c5nr01951f1.pdf]

*Supporting information for*

## **An Electrochemical Approach to Graphene Oxide Coated Sulfur for Long Cycle Life**

Joonhee Moon<sup>1†</sup>, Jungjin Park<sup>2,3†</sup>, Insu Jo<sup>1</sup>, Seung-Ho Yu<sup>2,3</sup>, Cheolho Jeon<sup>6</sup>, Jouhahn Lee<sup>6</sup>, Sung-Pyo Cho<sup>1,4</sup>, Yung-Eun Sung<sup>2,3\*</sup>, Byung Hee Hong<sup>1,5\*</sup>

<sup>1</sup>*Department of Chemistry, College of Natural Science, Seoul National University, Seoul 151-747, Republic of Korea*

<sup>2</sup>*School of Chemical and Biological Engineering, Seoul National University, Seoul 151-742, Republic of Korea.*

<sup>3</sup>*Center for Nanoparticle Research, Institute for Basic Science (IBS), Seoul 151-742, Republic of Korea*

<sup>4</sup>*National Center for Inter-University Research Facilities, Seoul National University, Seoul 141-742, Republic of Korea*

<sup>5</sup>*Graduate School of Convergence Science and Technology, Seoul National University, Suwon 443-270, Republic of Korea*

<sup>6</sup>*Korea Basic Science Institute, Daejeon 302-333, Republic of Korea*

† These authors contributed equally to this work.

\*Corresponding author, E-mail: byunghee@snu.ac.kr

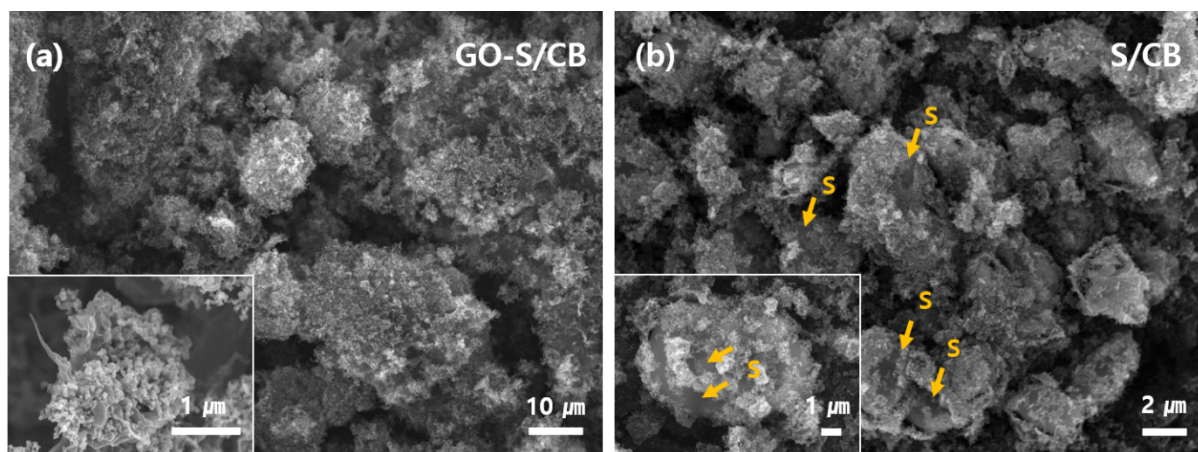

**Figure S1.** SEM images of (a) GO-S/CB and (b) S/CB composites. The insets show the magnified images of GO-S/CB and S/CB, respectively.

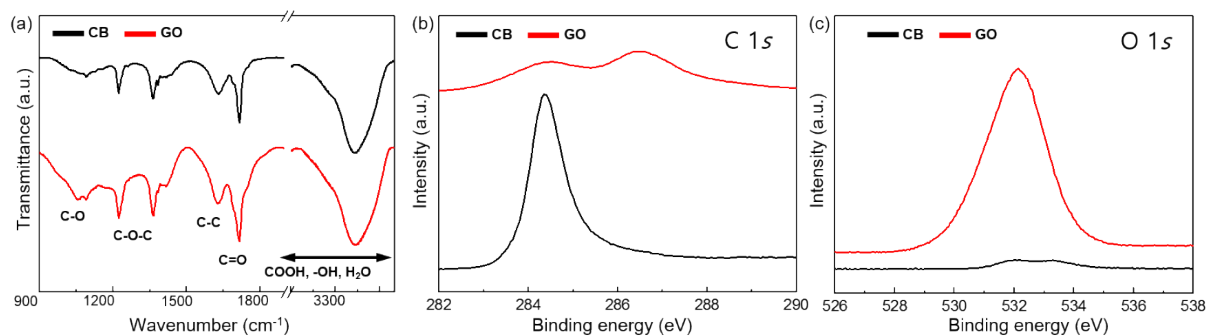

**Figure S2.** (a) Fourier transform infrared spectroscopy (FTIR) spectra of CB and GO. Strong peaks attributed to the characteristic vibrational mode of oxygen functional groups. X-ray photoelectron spectroscopy of CB and GO. (b) C 1s peaks and (c) O 1s peaks. Compared to CB, GO shows higher oxygen related peaks such as  $-\text{OH}$ ,  $\text{C}=\text{O}$ ,  $\text{C}-\text{O}$  and  $\text{C}-\text{O}-\text{C}$  at  $3434\text{ cm}^{-1}$ ,  $1725\text{ cm}^{-1}$ ,  $1024\text{--}1180\text{ cm}^{-1}$ , and  $1200\text{ cm}^{-1}$ , respectively. In addition, the C 1s peak of CB is sharp and strong, while the peaks of GO at  $286.27$  and  $287.18\text{ cm}^{-1}$  are rather broad and weak. On the contrary, the O 1s peak of GO is stronger than that of CB.
